# Supplementary material for: Pain Assessment in Oral Medicine through Its Different Dimensions: A Comprehensive Review
Source: MDPI journal article supplement (doi:10.3390/dj11110246), 2023-10-24
Supplement: s1 [file s1]

**Table S1.** Search Strategies for electronic databases.

| Database         | Search strategy                                                                                                                             |
|------------------|---------------------------------------------------------------------------------------------------------------------------------------------|
| PubMed (MEDLINE) | #1 "Pain Measurement" [MESH] OR (Measurement, Pain) OR (Pain Measurements) OR (Pain Assessment) OR (Assessment, Pain) OR (Pain Assessments) |
|                  | #2 "Mouth" [MESH] OR (Oral Cavity) OR (Cavity, Oral) OR (Oral Cavity Proper) OR (Mouth Cavity Proper) OR (Cavitas oris propria)             |
|                  | #3 "Anxiety" [MESH] OR "Angst" OR "Hypervigilance" OR "Nervousness" OR "Anxiousness"                                                        |
|                  | #4 "Depression" [MESH] OR "Depressive Symptoms" OR "Depressive Symptom" OR "Symptom, Depressive"                                            |
|                  | #5 "Quality of Life" [MESH] OR "Life Quality" OR "Health-Related Quality Of Life" OR "Health Related Quality Of Life" OR "HRQOL"            |
|                  | #6 "Behavior" [MESH] OR "Behaviors" OR "Acceptance Processes" OR "Acceptance Process" OR "Process, Acceptance", OR "Processes, Acceptance"  |
|                  | #7 "Sleep" [MESH] OR "Sleeping Habits" OR "Sleep Habits" OR "Habit, Sleep" OR "Habits, Sleep" OR "Sleep Habit" OR "Sleeping Habit"          |
|                  | #8 #1 AND #2 AND #3                                                                                                                         |
|                  | #9 #1 AND #2 AND #4                                                                                                                         |
|                  | #10 #1 AND #2 AND #3 AND #4                                                                                                                 |
|                  | #11 #1 AND #2 AND #5                                                                                                                        |
|                  | #12 #1 AND #2 AND #6                                                                                                                        |

|        |                                                                                                                                             |
|--------|---------------------------------------------------------------------------------------------------------------------------------------------|
|        | #13 #1 AND #2 AND #7                                                                                                                        |
|        | #1 "Pain Measurement" [MESH] OR (Measurement, Pain) OR (Pain Measurements) OR (Pain Assessment) OR (Assessment, Pain) OR (Pain Assessments) |
|        | #2 "Mouth" [MESH] OR (Oral Cavity) OR (Cavity, Oral) OR (Oral Cavity Proper) OR (Mouth Cavity Proper) OR (Cavitas oris propria)             |
|        | #3 "Anxiety" [MESH] OR "Angst" OR "Hypervigilance" OR "Nervousness" OR "Anxiousness"                                                        |
|        | #4 "Depression" [MESH] OR "Depressive Symptoms" OR "Depressive Symptom" OR "Symptom, Depressive"                                            |
|        | #5 "Quality of Life" [MESH] OR "Life Quality" OR "Health-Related Quality Of Life" OR "Health Related Quality Of Life" OR "HRQOL"            |
| SCOPUS | #6 "Behavior" [MESH] OR "Behaviors" OR "Acceptance Processes" OR "Acceptance Process" OR "Process, Acceptance", OR "Processes, Acceptance"  |
|        | #7 "Sleep" [MESH] OR "Sleeping Habits" OR "Sleep Habits" OR "Habit, Sleep" OR "Habits, Sleep" OR "Sleep Habit" OR "Sleeping Habit"          |
|        | #8 #1 AND #2 AND #3                                                                                                                         |
|        | #9 #1 AND #2 AND #4                                                                                                                         |
|        | #10 #1 AND #2 AND #3 AND #4                                                                                                                 |
|        | #11 #1 AND #2 AND #5                                                                                                                        |
|        | #12 #1 AND #2 AND #6                                                                                                                        |
|        | #13 #1 AND #2 AND #7                                                                                                                        |

---

#1 "Pain Measurement" [MESH] OR (Measurement, Pain) OR (Pain Measurements) OR (Pain Assessment) OR (Assessment, Pain) OR (Pain Assessments)

#2 "Mouth" [MESH] OR (Oral Cavity) OR (Cavity, Oral) OR (Oral Cavity Proper) OR (Mouth Cavity Proper) OR (Cavitas oris propria)

#3 "Anxiety" [MESH] OR "Angst" OR "Hypervigilance" OR "Nervousness" OR "Anxiousness"

#4 "Depression" [MESH] OR "Depressive Symptoms" OR "Depressive Symptom" OR "Symptom, Depressive"

#5 "Quality of Life" [MESH] OR "Life Quality" OR "Health-Related Quality Of Life" OR "Health Related Quality Of Life" OR "HRQOL"

#6 "Behavior" [MESH] OR "Behaviors" OR "Acceptance Processes" OR "Acceptance Process" OR "Process, Acceptance", OR "Processes, Acceptance"

#7 "Sleep" [MESH] OR "Sleeping Habits" OR "Sleep Habits" OR "Habit, Sleep" OR "Habits, Sleep" OR "Sleep Habit" OR "Sleeping Habit"

#8 #1 AND #2 AND #3

#9 #1 AND #2 AND #4

#10 #1 AND #2 AND #3 AND #4

#11 #1 AND #2 AND #5

#12 #1 AND #2 AND #6

#13 #1 AND #2 AND #7

---

**Table S2.** Summary table of studies excluded in this comprehensive review

| <b>Excluded Studies</b>          | <b>Exclusion Reasons</b> |
|----------------------------------|--------------------------|
| Menendez et al., 2016<br>[1]     | Comprehensive Review     |
| Hawker et al., 2011<br>[2]       | Comprehensive Review     |
| Hajihasani et al., 2019<br>[3]   | Systematic Review        |
| Khalid et al., 2012<br>[4]       | Comprehensive Review     |
| Xu et al., 2020<br>[5]           | Comprehensive Review     |
| Raja et al., 2020<br>[6]         | Comprehensive Review     |
| Lindsay et al., 2021<br>[7]      | Comprehensive Review     |
| Gorczyca et al., 2013<br>[8]     | Comprehensive Review     |
| Pigg et al., 2020<br>[9]         | Comprehensive Review     |
| Lin et al., 2022<br>[10]         | Comprehensive Review     |
| Sheng et al., 2017<br>[11]       | Comprehensive Review     |
| Michealides et al., 2019<br>[12] | Comprehensive Review     |
| Rogers et al., 2022<br>[13]      | Meta-analysis            |
| Finan et al., 2014<br>[14]       | Comprehensive Review     |

---

Whibley et al., 2019

[15]

---

Systematic Review

**Table S3.** Summary table of studies included in this comprehensive review

| Authors and Year of Publication | Study Design                           | Assessment tool(s)                                       | Subjects | Type of pain                                              |
|---------------------------------|----------------------------------------|----------------------------------------------------------|----------|-----------------------------------------------------------|
| Treister et al., 2019<br>[16]   | Randomized<br>Controlled Trial         | VAS<br>MPQ<br>NPS<br>PD-Q<br>BAI<br>BDI<br>EIHS<br>FMRIB | 68       | Sub-acute back pain (SBP)<br>Chronic Low-back pain (CLBP) |
| Shafshak et al., 2021<br>[17]   | Cross-sectional Study                  | VAS<br>NRS                                               | 100      | CLBP                                                      |
| Kendrick et al., 2005<br>[18]   | Prospective Descriptive<br>Trial Study | NRS                                                      | 354      | Acute pain (general)                                      |
| Taddio et al., 2009<br>[19]     | Randomized<br>Controlled Trial         | VAS                                                      | 120      | Due to immunization injections                            |
| Todd et al., 2017<br>[20]       | Randomized<br>Controlled Trial         | VAS                                                      | 48       | Acute pain due to trauma                                  |
| Closs et al., 2004<br>[21]      | Comparative Study                      | VRS<br>NRS<br>FPS<br>CAS<br>MVAS                         | 113      | Acute and chronic pain (general)                          |
| Lewinson et al., 2013<br>[22]   | Descriptive Laboratory<br>Study        | CVAS                                                     | 36       | Due to pathellofemoral pain syndrome                      |
| Ruskin et al., 2014<br>[23]     | Cross-sectional Study                  | NRS<br>CAS                                               | 143      | Chronic pain (general)                                    |
| Wikström et al., 2018<br>[24]   | Repeted Measurement<br>Study           | NRS<br>VRS                                               | 479      | Nausea                                                    |

|                                          |                                |                            |     |                                  |
|------------------------------------------|--------------------------------|----------------------------|-----|----------------------------------|
| Alghadir et al., 2018<br>[25]            | Repeted Measurement<br>Study   | VAS<br>NRS<br>VRS          | 121 | Osteoarthritic pain              |
| Jenkins et al., 2009<br>[26]             | Correlational Study            | VNRS<br>VRS                | 50  | Pruritus                         |
| Hicks et al., 2001<br>[27]               | Randomized<br>Controlled Trial | FPS                        |     | Acute and chronic pain (generic) |
| Suraseranivongse et<br>al., 2005<br>[28] | Cross-validation Study         | FPS<br>VRS<br>CHEOPS       | 87  | Post-operative pain              |
| Sun et al., 2015<br>[29]                 | Cross-validation Study         | FPS-R<br>CAS               | 62  | Pain due to ASA I-III            |
| Gulur et al., 2009<br>[30]               | Cross-validation Study         | CFPS                       | 129 | Acute and chronic pain (generic) |
| Fadayevatan et al.,<br>2019<br>[31]      | Cross-validation Study         | FPS                        | 217 | Chronic knee pain                |
| Lee et al., 2015<br>[32]                 | Comparative Study              | RAS                        | 60  | Chronic spinal pain              |
| Girandea et al.,<br>2004<br>[33]         | Randomized<br>Controlled Trial | VAS                        | 85  | Due to sciatica                  |
| Ferreira-Valente et<br>al., 2011<br>[34] | Cross-validation Study         | VAS<br>NRS<br>VRS<br>FPS-R | 127 | Experimentally-induced pain      |
| Thong et al., 2018<br>[35]               | Cross-validation Study         | NRS<br>VAS<br>VRS<br>FPS-R | 101 | CLBP<br>Knee pain                |

|                                     |                                                   |                                                    |     |                                  |
|-------------------------------------|---------------------------------------------------|----------------------------------------------------|-----|----------------------------------|
| Miró et al., 2016<br>[36]           | Randomized<br>Controlled Trial                    | NRS<br>VRS<br>FPS                                  | 113 | Acute and chronic pain (generic) |
| Malara et al., 2016<br>[37]         | Prospective<br>Observational Study                | NRS<br>PAINAD<br>CSDD<br>CMAI<br>NPI               | 233 | Acute and chronic pain (generic) |
| Ersek et al., 2010<br>[38]          | Randomized<br>Controlled Trial                    | CNPI<br>PAINAD                                     | 60  | Acute and chronic pain (generic) |
| Paulson-Conger et al., 2011<br>[39] | Descriptive,<br>Comparative,<br>Prospective Study | CPOT<br>PAINAD                                     | 100 | Acute and chronic pain (generic) |
| De-Figuerido et al., 2020<br>[40]   | Randomized<br>Controlled Trial                    | VAS<br>VRS<br>PIS                                  | 120 | Orofacial pain (dental)          |
| Tran et al., 2023<br>[41]           | Cross-sectional Study                             | EDA<br>Cold and electric<br>pulp testing<br>VAS    | 53  | Orofacial pain (dental)          |
| Odai et al., 2015<br>[42]           | Cross-sectional Study                             | VAS<br>FCT                                         | 185 | Orofacial pain (dental)          |
| Shah et al., 2012<br>[43]           | Randomized<br>Controlled Trial                    | VAS<br>Swelling and<br>trismus assessment<br>Scale | 60  | Orofacial pain (dental)          |
| Khatri et al., 2012<br>[44]         | Comparative Study                                 | VAS<br>FPS                                         | 180 | Orofacial pain (dental)          |
| Versloot et al., 2004<br>[45]       | Randomized<br>Controlled Trial                    | DDQ                                                | 99  | Orofacial pain (dental)          |
| Felipak et al., 2020                | Cross-sectional Study                             | DDQ                                                | 375 | Orofacial pain (dental)          |



|                                                 |                                    |                                           |     |                                     |
|-------------------------------------------------|------------------------------------|-------------------------------------------|-----|-------------------------------------|
| <b>[46]</b>                                     |                                    |                                           |     |                                     |
| Daher et al., 2015<br><b>[47]</b>               | Randomized<br>Controlled Trial     | DDQ                                       | 326 | Orofacial pain (dental)             |
| Senirkentli et al.,<br>2021<br><b>[48]</b>      | Cross-sectional Study              | DDQ                                       | 81  | Orofacial pain (dental)             |
| Mendonça et al.,<br>2018<br><b>[49]</b>         | Validation Study                   | Body maps                                 | 80  | Musculoskeletal Pain                |
| Aibel et al., 2023<br><b>[50]</b>               | Validation Study                   | Pelvic Pain Map<br>GUP)                   | 298 | Chronic Pelvic Pain Syndrome (CPPS) |
| Elson et al., 2011<br><b>[51]</b>               | Validation Study                   | Photografic Knee<br>Pain Map              | 70  | Knee pain                           |
| Adamo et al., 2020<br><b>[52]</b>               | Case-control Clinical<br>Study     | OHIP-14<br>GOHAI<br>VAS<br>HAM-A<br>HAM-D | 52  | Orofacial pain (mucosal)            |
| Sevrain et al., 2015<br><b>[53]</b>             | Retrospective Clinical<br>Study    | DN4i<br>HADS<br>QDSA<br>MPQ               | 35  | Orofacial pain (mucosal)            |
| Melzack et al., 1985<br><b>[54]</b>             | Clinical Trial                     | MPQ                                       | 145 | Musculoskeletal pain                |
| Kuliś et al., 2011<br><b>[55]</b>               | Validation Study                   | ;MPQ<br>SF-36                             | 30  | Musculoskeletal pain                |
| Fontana Carvalho et<br>al., 2020<br><b>[56]</b> | Pilot Randomized<br>Clinical Trial | MPQ<br>VAS                                | 20  | CLBP                                |
| Renovato França et<br>al., 2010                 | Randomized<br>Controlled Trial     | MPQ<br>ODQ                                | 30  | CLBP                                |

|                                            |                                |                                                                                       |     |                                                                                  |
|--------------------------------------------|--------------------------------|---------------------------------------------------------------------------------------|-----|----------------------------------------------------------------------------------|
| <b>[57]</b>                                |                                |                                                                                       |     |                                                                                  |
| Dworkin et al., 2015<br><b>[58]</b>        | Secondary Analysis Study       | MPQ<br>BPI<br>HADS<br>RMDQ                                                            | 666 | Acute LBP<br>Radicular leg pain                                                  |
| Erdogan et al., 2019<br><b>[59]</b>        | Cross-sectional Study          | Cold and electric<br>pulp testing<br>Percussion testing                               | 228 | Orofacial pain (dental)                                                          |
| Lewandowski et al.,<br>2009<br><b>[60]</b> | Randomized<br>Controlled Trial | Pain diary<br>RCADS<br>MDD<br>FPS<br>Children'ss Activity<br>Limitations<br>Interview | 93  | Orofacial pain (headache)<br>Chronic arthritis pain<br>Due to sicke cell disease |
| Vertsberger et al.,<br>2022<br><b>[61]</b> | Observational Study            | Pain diary                                                                            | 84  | CLBP                                                                             |
| Karoly et al., 2014<br><b>[62]</b>         | Observational Study            | Interview<br>Pain diary                                                               | 131 | Chronic pain (generic)                                                           |
| Gruszka et al., 2019<br><b>[63]</b>        | Remote app-based<br>Study      | Pain diary                                                                            | 205 | Acute and chronic pain (generic)                                                 |
| Mitra et al., 2020<br><b>[64]</b>          | Clinical Trial                 | BPAT                                                                                  | 400 | Acute and chronic pain (generic)                                                 |
| Delgado et al., 2021<br><b>[65]</b>        | Randomized<br>Controlled Trial | Frankl Behavior<br>Rating Scale                                                       | 100 | Orofacial pain (dental or mucosal)                                               |
| Gomarverdi et al.,<br>2019<br><b>[66]</b>  | Cross-sectional Study          | BPS<br>CPOT                                                                           | 90  | Acute and chronic pain (generic)                                                 |
| Ruscheweyh et al.,<br>2012                 | Validation Study               | PSQ                                                                                   | 185 | Chronic pain (generic)                                                           |

|                               |                                         |                                                                       |      |                                         |
|-------------------------------|-----------------------------------------|-----------------------------------------------------------------------|------|-----------------------------------------|
| [67]                          |                                         |                                                                       |      |                                         |
| Sellers et al., 2013<br>[68]  | Observational Study                     | PSQ<br>VAS                                                            | 136  | LBP                                     |
| Bell et al., 2018<br>[69]     | Comparative Study                       | PSQ<br>VAS                                                            | 57   | Acute and chronic pain (generic)        |
| Heary et al., 2020<br>[70]    | Retrospective Study                     | PSQ<br>MPQ                                                            | 331  | Due to nerve injury                     |
| Müller et al., 2017<br>[71]   | Cross-sectional Study                   | NRS<br>USRP<br>MHI<br>WHOQoL-BREF                                     | 834  | Due to nerve injury                     |
| Kwan et al., 2016<br>[72]     | Cross-sectional Study                   | SF-36                                                                 | 196  | Due to spondyloarthritis                |
| Kishi et al., 2005<br>[73]    | Cohort Study                            | SF-36<br>Volatile sulfur<br>compound<br>concentration in<br>mouth air | 70   | Halitosis                               |
| Campos et al., 2021<br>[74]   | Two Cross-sectional<br>Studies          | OHIP-14                                                               | 5266 | Orofacial pain                          |
| Omara et al., 2021<br>[75]    | Cross-sectional Study                   | OHIP-14                                                               | 516  | Orofacial pain<br>Due to osteoarthritis |
| Muszkopf et al., 2018<br>[76] | Randomized<br>Controlled Trial          | OHIP-14                                                               | 210  | Orofacial pain (dental or mucosal)      |
| Yule et al., 2015<br>[77]     | Validation Study                        | RCD/TMD<br>assessment<br>OHIP-49                                      | 76   | Orofacial pain<br>(temporomandibular)   |
| Serrano et al., 2022<br>[78]  | Observational Cross-<br>sectional Study | OHIP-14<br>VAS<br>DMFT<br>Sialometry                                  | 61   | Due to Sjögren's syndrome               |

|                                         |                                |                                                                                   |     |                                  |
|-----------------------------------------|--------------------------------|-----------------------------------------------------------------------------------|-----|----------------------------------|
| Chana et al., 2021<br>[79]              | Cross-sectional Study          | PCS<br>PSEQ<br>CPAQ                                                               | 36  | Orofacial pain (mucosal)         |
| López-Jornet et al.,<br>2008<br>[80]    | Observational Study            | OHIP-49                                                                           | 60  | Orofacial pain                   |
| Kyle et al., 2016<br>[81]               | Randomized<br>Controlled Trial | HAM-D                                                                             | 86  | Acute and chronic pain (generic) |
| Munhoz Carneiro et<br>al., 2015<br>[82] | Randomized<br>Controlled Trial | HAM-D<br>MADS                                                                     | 91  | Acute and chronic pain (generic) |
| Meltzer-Brody et al.,<br>2009<br>[83]   | Clinical Trial                 | VAS<br>HAM-A<br>HAM-D<br>MPQ                                                      | 43  | Chronic Pelvic Pain              |
| Donham et al., 1984<br>[84]             | Cross-validation Study         | STAI                                                                              | 219 | Acute and chronic pain (generic) |
| Canfora et al., 2022<br>[85]            | Case-control Study             | VAS<br>SF-MPQ<br>BPI<br>PD-Q<br>BDI-II<br>STAI<br>PSQI<br>ESS<br>SF-36<br>OHIP-14 | 40  | Orofacial<br>(mucosal)           |
| Zitser et al., 2022<br>[86]             | Cross-validation Study         | At-home sleep<br>assessment<br>PSQI                                               | 32  | Acute and chronic pain (generic) |

|                                   |                                      |                                                                                                                                                        |     |                          |
|-----------------------------------|--------------------------------------|--------------------------------------------------------------------------------------------------------------------------------------------------------|-----|--------------------------|
| Freedland et al.,<br>2019<br>[87] | Randomized<br>Controlled Trial       | BDI<br>PROMIS®                                                                                                                                         | 158 | Acute and chronic pain   |
| Choi et al., 2014<br>[88]         | Prospective Cohort<br>Study          | BDI<br>HADS-D<br>PHQ<br>SF-36                                                                                                                          | 546 | Due to nerve injury      |
| Chan et al., 2017<br>[89]         | Validation Study                     | HADS-A<br>HADS-D                                                                                                                                       | 160 | Due to spondyloarthritis |
| Nipp et al., 2018<br>[90]         | Randomized Trial                     | FACT-G<br>HADS                                                                                                                                         | 237 | Due to advanced cancer   |
| Mitchell et al., 2010<br>[91]     | Validation Study                     | VAS<br>MPQ<br>FSFI                                                                                                                                     | 18  | Pelvic pain              |
| Sikora et al., 2018<br>[92]       | Observational Case-<br>control Study | STAI<br>BDI                                                                                                                                            | 93  | Orofacial Pain           |
| Malik et al., 2012<br>[93]        | Clinical Trial                       | VAS<br>HADS<br>GHQ                                                                                                                                     | 100 | Orofacial Pain           |
| Burns et al., 2012<br>[94]        | Randomized<br>Controlled Trial       | BPI<br>PCS<br>NRS<br>Roland-Morris<br>Disability Scale<br>Center for<br>Epidemiological<br>Study<br>RMDS<br>Depression<br>Assessment<br>QoL Assessment | 83  | Chronic pain (generic)   |

|                                |                                     |                                                                                                              |      |                                  |
|--------------------------------|-------------------------------------|--------------------------------------------------------------------------------------------------------------|------|----------------------------------|
| Shi et al., 2022<br>[95]       | Cross-sectional Study               | TIPI                                                                                                         | 2223 | Acute and chronic pain (generic) |
| Nunes et al., 2018<br>[96]     | Cross-sectional Study               | TIPI                                                                                                         | 333  | Acute and chronic pain (generic) |
| Thørrisen et al., 2021<br>[97] | Cross-sectional Study               | TIPI                                                                                                         | 5009 | Acute and chronic pain (generic) |
| Huyan et al., 2021<br>[98]     | Cross-sectional Study               | TIPI<br>VAS<br>MPQ<br>Zung's Self-Rating<br>Depression Scale<br>PCS<br>Central<br>Sensitization<br>Inventory | 248  | Orofacial pain                   |
| Darnall et al., 2017<br>[99]   | Cross-sectional<br>Validation Study | PCS                                                                                                          | 519  | Chronic pain (generic)           |
| Cano et al., 2005<br>[100]     | Preliminary Validation<br>Study     | PCS<br>NRS                                                                                                   | 264  | Acute and chronic pain (generic) |
| Roguli et al., 2014<br>[101]   | Cross-sectional Study               | OHIP-14<br>PCS                                                                                               | 30   | Orofacial                        |
| Walker et al., 2020<br>[102]   | Retrospective Cohort<br>Study       | ESS                                                                                                          | 85   | Acute and chronic pain (generic) |
| Sap-Anan et al., 2021<br>[103] | Validation Study                    | ESS<br>BDI<br>In-laboratory<br>polysomnography<br>ISI                                                        | 95   | Acute and chronic pain (generic) |
| Frohnhofer et al.,<br>2009     | Randomized<br>Controlled Trial      | ESS                                                                                                          | 458  | Acute and chronic pain (generic) |

|                                              |                                   |                                               |     |                                  |
|----------------------------------------------|-----------------------------------|-----------------------------------------------|-----|----------------------------------|
| <b>[104]</b>                                 |                                   |                                               |     |                                  |
| Damiani et al., 2013<br><b>[105]</b>         | Randomized<br>Controlled Trial    | ESS                                           | 225 | Acute and chronic pain (generic) |
| Adamo et al., 2018<br><b>[106]</b>           | Case-Control<br>Multicenter Study | PSQI<br>ESS<br>HAM-D<br>HAM-A<br>NRS<br>T-PRI | 200 | Orofacial Pain                   |
| Kirmizigil et al.,<br>2020<br><b>[107]</b>   | Randomized<br>Controlled Trial    | VAS<br>MSQ<br>PSQI                            | 28  | Pelvic Pain                      |
| Lee et al., 2020<br><b>[108]</b>             | Cross-sectional Study             | NRS<br>PSQI<br>HADS                           | 25  | Orofacial Pain                   |
| Lee et al., 2022<br><b>[109]</b>             | Cross-sectional Study             | BPI<br>PSQI<br>SCL-90                         | 65  | Orofacial Pain                   |
| Lopez-Jornet et al.,<br>2014<br><b>[110]</b> | Observational Study               | VAS<br>HADS<br>OHIP-14<br>PSQI<br>ESS         | 70  | Orofacial Pain                   |

Abbreviations (in alphabetical order): BAI, Beck's anxiety scale; BPI, brief pain inventory; CAS, color analogue scale; CMAI, Cohen-Mansfield agitation inventory; CNPI, checklist of nonverbal pain behaviors; CPAQ, chronic pain acceptance questionnaire; CPOT, critical-care pain observation tool; CSDD, Cornell scale for depression in dementia; CVAS, computerized visual analogue scale; DDQ, dental discomfort questionnaire; DMFT, decayed missing filled teeth; DN4i, douleur neuropathique 4-questionnaire; EDA, electrodermal activity; EIHS, Edinburgh inventory handedness scale; ESS, Epworth sleepiness scale; FCT, full-cup test; FBRs, Frank's behavior rating scale; FPS, faces pain scale; FPS-R, faces pain scale revised; FACT-G, functional assessment of cancer therapy-general; FMRIB, functional magnetic resonance imaging of the brain; GHQ, general health questionnaire; GOHAI, general oral-health assessment index; GUPI, genitourinary pain index; HAM-A, Hamilton's anxiety rating scale; HAM-D, Hamilton's depression rating scale; HADS, hospital anxiety and depression scale; ISI, insomnia severity index; MADS, Montgomery-Asber

depression scale; MDD, major depressive disorder subscale; MPQ, McGill pain questionnaire; MSQ, menstrual symptoms questionnaire; MVAS, mechanical visual analogue scale; NPI, neuropsychiatric inventory; NPS, Washington neuropathic pain scale; NRS, numerical rating scale; ODQ, Oswestry disability questionnaire; OHIP-14, oral-health impact profile-14; PAINAD, pain assessment in advanced dementia; PD-Q, Pain DETECT questionnaire; PCS, pain catastrophizing scale; PHQ, patient health questionnaire depression module; PIS, periapical index score; PQDSA, questionnaire de la douleur de Saint-Antoine; PROMIS®, patient-reported outcomes measurement information system®; QDSA, questionnaire de la douleur de Saint-Antoine; RCADS, revised child anxiety and depression scale; RCD/TMD, research diagnostic criteria/temporomandibular disorders; RMDS, Roland-Morris disability scale center for epidemiological study; SF-36, short-form 36; SF-MPQ, short-form McGill pain questionnaire; SCL-90, symptoms checklist-90; STAI, state-trait anxiety index; T-PRI, total pain rating index; TIPI, ten-item personality inventory; USRP, Utrecht's scale of evaluation of participation; VAS, visual analogue scale; VNRS, verbal numeric rating scale; VRS, verbal rating scale; ZSDP, Zung's self-rating depression scale



**Table S4.** Criteria for judging risk of bias in the “Risk of bias” assessment tool.

|                                                    |                                                                                                                                                                                                                                                                                                                                                                                                                                                                                                                                                                                                                       |
|----------------------------------------------------|-----------------------------------------------------------------------------------------------------------------------------------------------------------------------------------------------------------------------------------------------------------------------------------------------------------------------------------------------------------------------------------------------------------------------------------------------------------------------------------------------------------------------------------------------------------------------------------------------------------------------|
| <b>Random Sequence Generation</b>                  |                                                                                                                                                                                                                                                                                                                                                                                                                                                                                                                                                                                                                       |
| Criteria for a judgement of ‘Low risk’ of bias.    | The investigators describe a random component in the sequence generation process.                                                                                                                                                                                                                                                                                                                                                                                                                                                                                                                                     |
| Criteria for the judgement of ‘High risk’ of bias. | The investigators describe a non-random component in the sequence generation process. Usually, the description would involve some systematic, non-random approach.<br>Other non-random approaches happen much less frequently than the systematic approaches mentioned above and tend to be obvious. They usually involve judgement or some method of non-random categorization of participants.                                                                                                                                                                                                                      |
| <b>Allocation Concealment</b>                      |                                                                                                                                                                                                                                                                                                                                                                                                                                                                                                                                                                                                                       |
| Criteria for a judgement of ‘Low risk’ of bias.    | Participants and investigators enrolling participants could not foresee assignment because one of the following, or an equivalent method, was used to conceal allocation.                                                                                                                                                                                                                                                                                                                                                                                                                                             |
| Criteria for the judgement of ‘High risk’ of bias. | Participants or investigators enrolling participants could possibly foresee assignments and thus introduce selection bias.                                                                                                                                                                                                                                                                                                                                                                                                                                                                                            |
| <b>Blinding</b>                                    |                                                                                                                                                                                                                                                                                                                                                                                                                                                                                                                                                                                                                       |
| Criteria for a judgement of ‘Low risk’ of bias.    | Any one of the following: <ul style="list-style-type: none"> <li>- No blinding or incomplete blinding, but the review authors judge that the outcome is not likely to be influenced by lack of blinding;</li> <li>- Blinding of participants and key study personnel ensured, and unlikely that the blinding could have been broken;</li> <li>- No blinding of outcome assessment, but the review authors judge that the outcome measurement is not likely to be influenced by lack of blinding;</li> <li>- Blinding of outcome assessment ensured, and unlikely that the blinding could have been broken.</li> </ul> |
| Criteria for the judgement of ‘High risk’ of bias. | Any one of the following: <ul style="list-style-type: none"> <li>- No blinding or incomplete blinding, and the outcome is likely to be influenced by lack of blinding;</li> </ul>                                                                                                                                                                                                                                                                                                                                                                                                                                     |

|                                                    |                                                                                                                                                                                                                                                                                                                                                                                                                                                                                                                                                                                                                                                                                                                                                                                                                                                                                                       |
|----------------------------------------------------|-------------------------------------------------------------------------------------------------------------------------------------------------------------------------------------------------------------------------------------------------------------------------------------------------------------------------------------------------------------------------------------------------------------------------------------------------------------------------------------------------------------------------------------------------------------------------------------------------------------------------------------------------------------------------------------------------------------------------------------------------------------------------------------------------------------------------------------------------------------------------------------------------------|
|                                                    | <ul style="list-style-type: none"> <li>- Blinding of key study participants and personnel attempted, but likely that the blinding could have been broken, and the outcome is likely to be influenced by lack of blinding;</li> <li>- No blinding of outcome assessment, and the outcome measurement is likely to be influenced by lack of blinding;</li> <li>- Blinding of outcome assessment, but likely that the blinding could have been broken, and the outcome measurement is likely to be influenced by lack of blinding.</li> </ul>                                                                                                                                                                                                                                                                                                                                                            |
| <b>Incomplete Outcome Data</b>                     |                                                                                                                                                                                                                                                                                                                                                                                                                                                                                                                                                                                                                                                                                                                                                                                                                                                                                                       |
| Criteria for a judgement of 'Low risk' of bias.    | <p>Any one of the following:</p> <ul style="list-style-type: none"> <li>- No missing outcome data;</li> <li>- Reasons for missing outcome data unlikely to be related to true outcome (for survival data, censoring unlikely to be introducing bias);</li> <li>- Missing outcome data balanced in numbers across intervention groups, with similar reasons for missing data across groups;</li> <li>- For dichotomous outcome data, the proportion of missing outcomes compared with observed event risk not enough to have a clinically relevant impact on the intervention effect estimate;</li> <li>- For continuous outcome data, plausible effect size (difference in means or standardized difference in means) among missing outcomes not enough to have a clinically relevant impact on observed effect size;</li> <li>- Missing data have been imputed using appropriate methods.</li> </ul> |
| Criteria for the judgement of 'High risk' of bias. | <p>Any one of the following:</p> <ul style="list-style-type: none"> <li>- Reason for missing outcome data likely to be related to true outcome, with either imbalance in numbers or reasons for missing data across intervention groups;</li> <li>- For dichotomous outcome data, the proportion of missing outcomes compared with observed event risk enough to induce clinically relevant bias in intervention effect estimate;</li> <li>- For continuous outcome data, plausible effect size (difference in means or standardized difference in means) among missing outcomes enough to induce clinically relevant bias in observed effect size;</li> </ul>                                                                                                                                                                                                                                        |

- 
- 'As-treated' analysis done with substantial departure of the intervention received from that assigned at randomization;
  - Potentially inappropriate application of simple imputation.
- 

### **Selective Reporting**

---

Criteria for a judgement of 'Low risk' of bias.

Any one of the following:

- The study protocol is available and all of the study's pre-specified (primary and secondary) outcomes that are of interest in the review have been reported in the pre-specified way;
  - The study protocol is not available but it is clear that the published reports include all expected outcomes, including those that were pre-specified (convincing text of this nature may be uncommon).
- 

Criteria for the judgement of 'High risk' of bias.

Any one of the following:

- Not all of the study's pre-specified primary outcomes have been reported;
  - One or more primary outcomes is reported using measurements, analysis methods or subsets of the data (e.g., subscales) that were not pre-specified;
  - One or more reported primary outcomes were not pre-specified (unless clear justification for their reporting is provided, such as an unexpected adverse effect);
  - One or more outcomes of interest in the review are reported incompletely so that they cannot be entered in a meta-analysis;
  - The study report fails to include results for a key outcome that would be expected to have been reported for such a study.
-

## References

1. Menendez ME, Ring D. Factors Associated with Greater Pain Intensity. *Hand Clin.* 2016 Feb;32(1):27-31. doi: 10.1016/j.hcl.2015.08.004. PMID: 26611386.
2. Hawker GA, Mian S, Kendzerska T, French M. Measures of adult pain: Visual Analog Scale for Pain (VAS Pain), Numeric Rating Scale for Pain (NRS Pain), McGill Pain Questionnaire (MPQ), Short-Form McGill Pain Questionnaire (SF-MPQ), Chronic Pain Grade Scale (CPGS), Short Form-36 Bodily Pain Scale (SF-36 BPS), and Measure of Intermittent and Constant Osteoarthritis Pain (ICOAP). *Arthritis Care Res (Hoboken).* 2011 Nov;63 Suppl 11:S240-52. doi: 10.1002/acr.20543. PMID: 22588748.
3. Hajihasani A, Rouhani M, Salavati M, Hedayati R, Kahlaee AH. The Influence of Cognitive Behavioral Therapy on Pain, Quality of Life, and Depression in Patients Receiving Physical Therapy for Chronic Low Back Pain: A Systematic Review. *PM R.* 2019 Feb;11(2):167-176. doi: 10.1016/j.pmrj.2018.09.029. Epub 2019 Feb 11. PMID: 30266349.
4. Khalid W. Questionnaire designing and validation. *J Pak Med Assoc.* 2012 May;62(5):514-6. PMID: 22755326.
5. Xu X, Huang Y. Objective Pain Assessment: a Key for the Management of Chronic Pain. *F1000Res.* 2020 Jan 23;9:F1000 Faculty Rev-35. doi: 10.12688/f1000research.20441.1. PMID: 32047606; PMCID: PMC6979466. Kazi AM,
6. Raja SN, Carr DB, Cohen M, Finnerup NB, Flor H, Gibson S, Keefe FJ, Mogil JS, Ringkamp M, Sluka KA, Song XJ, Stevens B, Sullivan MD, Tutelman PR, Ushida T, Vader K. The revised International Association for the Study of Pain definition of pain: concepts, challenges, and compromises. *Pain.* 2020 Sep 1;161(9):1976-1982. doi: 10.1097/j.pain.0000000000001939. PMID: 32694387; PMCID: PMC7680716.
7. Mercer Lindsay N, Chen C, Gilam G, Mackey S, Scherrer G. Brain circuits for pain and its treatment. *Sci Transl Med.* 2021 Nov 10;13(619):eabj7360. doi: 10.1126/scitranslmed.abj7360. Epub 2021 Nov 10. PMID: 34757810; PMCID: PMC8675872.
8. Gorczyca R, Filip R, Walczak E. Psychological aspects of pain. *Ann Agric Environ Med.* 2013;Spec no. 1:23-7. PMID: 25000837.
9. International Classification of Orofacial Pain, 1st edition (ICOP). *Cephalalgia.* 2020;40(2):129-221. doi:10.1177/0333102419893823
10. Lin Y, De Araujo I, Stanley G, Small D, Geha P. Chronic pain precedes disrupted eating behavior in low-back pain patients. *PLoS One.* 2022 Feb 10;17(2):e0263527. doi: 10.1371/journal.pone.0263527. PMID: 35143525; PMCID: PMC8830732.
11. Sheng J, Liu S, Wang Y, Cui R, Zhang X. The Link between Depression and Chronic Pain: Neural Mechanisms in the Brain. *Neural Plast.* 2017;2017:9724371. doi: 10.1155/2017/9724371. Epub 2017 Jun 19. PMID: 28706741; PMCID: PMC5494581.
12. Michaelides A, Zis P. Depression, anxiety and acute pain: links and management challenges. *Postgrad Med.* 2019 Sep;131(7):438-444. doi: 10.1080/00325481.2019.1663705. Epub 2019 Sep 12. PMID: 31482756.
13. Rogers AH, Farris SG. A meta-analysis of the associations of elements of the fear-avoidance model of chronic pain with negative affect, depression, anxiety, pain-related disability and pain intensity. *Eur J Pain.* 2022 Sep;26(8):1611-1635. doi: 10.1002/ejp.1994. Epub 2022 Jul 7. PMID: 35727200; PMCID: PMC9541898.
14. Finan PH, Goodin BR, Smith MT. The association of sleep and pain: an update and a path forward. *J Pain.* 2013 Dec;14(12):1539-52. doi: 10.1016/j.jpain.2013.08.007. PMID: 24290442; PMCID: PMC4046588.
15. Whibley D, AlKandari N, Kristensen K, Barnish M, Rzewuska M, Druce KL, Tang NKY. Sleep and Pain: A Systematic Review of Studies of Mediation. *Clin J Pain.* 2019 Jun;35(6):544-558. doi: 10.1097/AJP.0000000000000697. PMID: 30829737; PMCID: PMC6504189.
16. Treister R, Honigman L, Lawal OD, Lanier RK, Katz NP. A deeper look at pain variability and its relationship with the placebo response: results from a randomized, double-blind, placebo-controlled clinical trial of naproxen in osteoarthritis of the knee. *Pain.* 2019 Jul;160(7):1522-1528. doi: 10.1097/j.pain.0000000000001538. PMID: 30817436.

17. Shafshak TS, Elnemr R. The Visual Analogue Scale Versus Numerical Rating Scale in Measuring Pain Severity and Predicting Disability in Low Back Pain. *J Clin Rheumatol*. 2021 Oct 1;27(7):282-285. doi: 10.1097/RHU.0000000000001320. PMID: 31985722.
18. Dawn B. Kendrick, Tania D. Strout, The minimum clinically significant difference in patient-assigned numeric scores for pain, *The American Journal of Emergency Medicine*, Volume 23, Issue 7, 2005, Pages 828-832, ISSN 0735-6757, <https://doi.org/10.1016/j.ajem.2005.07.009>. (<https://www.sciencedirect.com/science/article/pii/S0735675705002433>)
19. Taddio A, O'Brien L, Ipp M, Stephens D, Goldbach M, Koren G. Reliability and validity of observer ratings of pain using the visual analog scale (VAS) in infants undergoing immunization injections. *Pain*. 2009 Dec 15;147(1-3):141-6. doi: 10.1016/j.pain.2009.08.027. Epub 2009 Sep 19. PMID: 19767147.
20. Todd KH, Funk KG, Funk JP, Bonacci R. Clinical significance of reported changes in pain severity. *Ann Emerg Med*. 1996 Apr;27(4):485-9. doi: 10.1016/s0196-0644(96)70238-x. PMID: 8604867.
21. Closs SJ, Barr B, Briggs M, Cash K, Seers K. A comparison of five pain assessment scales for nursing home residents with varying degrees of cognitive impairment. *J Pain Symptom Manage*. 2004 Mar;27(3):196-205. doi: 10.1016/j.jpainsymman.2003.12.010. PMID: 15010098.
22. Lewinson RT, Wiley JP, Worobets JT, Stefanyshyn DJ. Development and validation of a computerized visual analog scale for the measurement of pain in patients with patellofemoral pain syndrome. *Clin J Sport Med*. 2013 Sep;23(5):392-6. doi: 10.1097/JSM.0b013e31828b0848. PMID: 23624572.
23. Ruskin D, Lalloo C, Amaria K, Stinson JN, Kewley E, Campbell F, Brown SC, Jeavons M, McGrath PA. Assessing pain intensity in children with chronic pain: convergent and discriminant validity of the 0 to 10 numerical rating scale in clinical practice. *Pain Res Manag*. 2014 May-Jun;19(3):141-8. doi: 10.1155/2014/856513. Epub 2014 Apr 7. PMID: 24712019; PMCID: PMC4158959.
24. Wikström L, Nilsson M, Broström A, Eriksson K. Patients' self-reported nausea: Validation of the Numerical Rating Scale and of a daily summary of repeated Numerical Rating Scale scores. *J Clin Nurs*. 2019 Mar;28(5-6):959-968. doi: 10.1111/jocn.14705. Epub 2018 Nov 8. PMID: 30357970.
25. Alghadir AH, Anwer S, Iqbal A, Iqbal ZA. Test-retest reliability, validity, and minimum detectable change of visual analog, numerical rating, and verbal rating scales for measurement of osteoarthritic knee pain. *J Pain Res*. 2018 Apr 26;11:851-856. doi: 10.2147/JPR.S158847. PMID: 29731662; PMCID: PMC5927184.
26. Jenkins HH, Spencer ED, Weissgerber AJ, Osborne LA, Pellegrini JE. Correlating an 11-point verbal numeric rating scale to a 4-point verbal rating scale in the measurement of pruritus. *J Perianesth Nurs*. 2009 Jun;24(3):152-5. doi: 10.1016/j.jopan.2009.01.010. PMID: 19500747.
27. Hicks CL, von Baeyer CL, Spafford PA, van Korlaar I, Goodenough B. The Faces Pain Scale-Revised: toward a common metric in pediatric pain measurement. *Pain*. 2001 Aug;93(2):173-183. doi: 10.1016/S0304-3959(01)00314-1. PMID: 11427329.
28. Suraseranivongse S, Montapaneewat T, Manon J, Chainchop P, Petcharatana S, Kraiprasit K. Cross-validation of a self-report scale for postoperative pain in school-aged children. *J Med Assoc Thai*. 2005 Mar;88(3):412-8. PMID: 15962653.
29. Sun T, West N, Ansermino JM, Montgomery CJ, Myers D, Dunsmuir D, Lauder GR, von Baeyer CL. A smartphone version of the Faces Pain Scale-Revised and the Color Analog Scale for postoperative pain assessment in children. *Paediatr Anaesth*. 2015 Dec;25(12):1264-73. doi: 10.1111/pan.12790. PMID: 26507916.
30. Cravero JP, Fanciullo GJ, McHugo GJ, Baird JC. The validity of the Computer Face Scale for measuring pediatric pain and mood. *Paediatr Anaesth*. 2013 Feb;23(2):156-61. doi: 10.1111/pan.12036. Epub 2012 Oct 13. PMID: 23061715.

31. Fadayevevan R, Alizadeh-Khoei M, Hessami-Azar ST, Sharifi F, Haghi M, Kaboudi B. Validity and Reliability of 11-face Faces Pain Scale in the Iranian Elderly Community with Chronic Pain. *Indian J Palliat Care*. 2019 Jan-Mar;25(1):46-51. doi: 10.4103/IJPC.IJPC\_126\_18. PMID: 30820100; PMCID: PMC6388585.
32. Lee JJ, Lee MK, Kim JE, Kim HZ, Park SH, Tae JH, Choi SS. Pain relief scale is more highly correlated with numerical rating scale than with visual analogue scale in chronic pain patients. *Pain Physician*. 2015 Mar-Apr;18(2):E195-200. PMID: 25794219
33. Giraudeau B, Rozenberg S, Valat JP. Assessment of the clinically relevant change in pain for patients with sciatica. *Ann Rheum Dis*. 2004 Sep;63(9):1180-1. doi: 10.1136/ard.2003.015792. PMID: 15308536; PMCID: PMC1755131.
34. Ferreira-Valente MA, Pais-Ribeiro JL, Jensen MP. Validity of four pain intensity rating scales. *Pain*. 2011 Oct;152(10):2399-2404. doi: 10.1016/j.pain.2011.07.005. PMID: 21856077.
35. Thong ISK, Jensen MP, Miró J, Tan G. The validity of pain intensity measures: what do the NRS, VAS, VRS, and FPS-R measure? *Scand J Pain*. 2018 Jan 26;18(1):99-107. doi: 10.1515/sjpain-2018-0012. PMID: 29794282.
36. Miró J, Castarlenas E, de la Vega R, Solé E, Tomé-Pires C, Jensen MP, Engel JM, Racine M. Validity of three rating scales for measuring pain intensity in youths with physical disabilities. *Eur J Pain*. 2016 Jan;20(1):130-7. doi: 10.1002/ejp.704. Epub 2015 Mar 31. PMID: 25833415; PMCID: PMC4591090.
37. Malara A, De Biase GA, Bettarini F, Ceravolo F, Di Cello S, Garo M, Praino F, Settembrini V, Sgrò G, Spadea F, Rispoli V. Pain Assessment in Elderly with Behavioral and Psychological Symptoms of Dementia. *J Alzheimers Dis*. 2016;50(4):1217-25. doi: 10.3233/JAD-150808. PMID: 26757042; PMCID: PMC4927851.
38. Ersek M, Herr K, Neradilek MB, Buck HG, Black B. Comparing the psychometric properties of the Checklist of Nonverbal Pain Behaviors (CNPI) and the Pain Assessment in Advanced Dementia (PAIN-AD) instruments. *Pain Med*. 2010 Mar;11(3):395-404. doi: 10.1111/j.1526-4637.2009.00787.x. Epub 2010 Jan 15. PMID: 20088854; PMCID: PMC2866060.
39. Paulson-Conger M, Leske J, Maidl C, Hanson A, Dziadulewicz L. Comparison of two pain assessment tools in nonverbal critical care patients. *Pain Manag Nurs*. 2011 Dec;12(4):218-24. doi: 10.1016/j.pmn.2010.05.008. Epub 2010 Sep 15. PMID: 22117753.
40. de-Figueiredo FED, Lima LF, Lima GS, Oliveira LS, Ribeiro MA, Brito-Junior M, Correa MB, Sousa-Neto MD, Faria E Silva AL. Apical periodontitis healing and postoperative pain following endodontic treatment with a reciprocating single-file, single-cone approach: A randomized controlled pragmatic clinical trial. *PLoS One*. 2020 Feb 3;15(2):e0227347. doi: 10.1371/journal.pone.0227347. Erratum in: *PLoS One*. 2020 Mar 11;15(3):e0230511. PMID: 32012166; PMCID: PMC6996828.
41. Tran HT, Kong Y, Talati A, Posada-Quintero H, Chon KH, Chen IP. The use of electrodermal activity in pulpal diagnosis and dental pain assessment. *Int Endod J*. 2023 Mar;56(3):356-368. doi: 10.1111/iej.13868. Epub 2022 Nov 17. PMID: 36367715; PMCID: PMC10044487.
42. Odai ED, Ehizele AO, Enabulele JE. Assessment of pain among a group of Nigerian dental patients. *BMC Res Notes*. 2015 Jun 19;8:251. doi: 10.1186/s13104-015-1226-5. PMID: 26087661; PMCID: PMC4474451.
43. Shah R, Mahajan A, Shah N, Dadhanian AP. Preemptive analgesia in third molar impaction surgery. *Natl J Maxillofac Surg*. 2012 Jul;3(2):144-7. doi: 10.4103/0975-5950.111368. PMID: 23833488; PMCID: PMC3700147.
44. Khatri A, Kalra N. A comparison of two pain scales in the assessment of dental pain in East delhi children. *ISRN Dent*. 2012;2012:247351. doi: 10.5402/2012/247351. Epub 2012 Feb 14. PMID: 22461986; PMCID: PMC3302111.
45. Versloot J, Veerkamp JS, Hoogstraten J. Dental Discomfort Questionnaire: predicting toothache in preverbal children. *Eur J Paediatr Dent*. 2004 Sep;5(3):170-3. PMID: 15471526.

46. Felipak PK, Menoncin BLV, Reyes MRT, Costa LR, de Souza JF, Menezes JVNB. Determinants of parental report of dental pain and discomfort in preschool children-The Dental Discomfort Questionnaire. *Int J Paediatr Dent*. 2020 Jul;30(4):436-444. doi: 10.1111/ipd.12614. Epub 2020 Jan 24. PMID: 31900956.
47. Daher A, Abreu MH, Costa LR. Recognizing preschool children with primary teeth needing dental treatment because of caries-related toothache. *Community Dent Oral Epidemiol*. 2015 Aug;43(4):298-307. doi: 10.1111/cdoe.12154. Epub 2015 Feb 6. PMID: 25656813.
48. Senirkentli GB, Tiralı RE, Bani M. Assessment of dental pain in children with intellectual disability using the dental discomfort questionnaire. *J Intellect Disabil*. 2021 Jan 27;1744629520981318. doi: 10.1177/1744629520981318. Epub ahead of print. PMID: 33499707.
49. Mendonça CR, Noll M, Silveira EA. Adaptation and validation of body maps for musculoskeletal pain location in patients with severe obesity. *Korean J Pain*. 2018 Oct;31(4):268-276. doi: 10.3344/kjp.2018.31.4.268. Epub 2018 Oct 1. PMID: 30310552; PMCID: PMC6177535.
50. Aibel K, Moldwin R. Validation of the 'Pelvic Pain Map': a new self-assessment tool for chronic pelvic pain localisation. *BJU Int*. 2023 Jun;131(6):763-769. doi: 10.1111/bju.15979. Epub 2023 Mar 23. PMID: 36722397.
51. Elson DW, Jones S, Caplan N, Stewart S, St Clair Gibson A, Kader DF. The photographic knee pain map: locating knee pain with an instrument developed for diagnostic, communication and research purposes. *Knee*. 2011 Dec;18(6):417-23. doi: 10.1016/j.knee.2010.08.012. Epub 2010 Sep 17. PMID: 20850976.
52. Adamo D, Pecoraro G, Fortuna G, Amato M, Marenzi G, Aria M, Mignogna MD. Assessment of oral health-related quality of life, measured by OHIP-14 and GOHAI, and psychological profiling in burning mouth syndrome: A case-control clinical study. *J Oral Rehabil*. 2020 Jan;47(1):42-52. doi: 10.1111/joor.12864. Epub 2019 Aug 10. PMID: 31332814.
53. Sevrain M, Brenaut E, Le Toux G, Misery L. Primary Burning Mouth Syndrome: A Questionnaire Study of Neuropathic and Psychological Components. *Am J Clin Dermatol*. 2016 Apr;17(2):171-8. doi: 10.1007/s40257-015-0170-4. PMID: 26691521.
54. Melzack R, Katz J, Jeans ME. The role of compensation in chronic pain: analysis using a new method of scoring the McGill Pain Questionnaire. *Pain*. 1985 Oct;23(2):101-112. doi: 10.1016/0304-3959(85)90052-1. PMID: 2933623.
55. Kachooei AR, Ebrahimzadeh MH, Erfani-Sayyar R, Salehi M, Salimi E, Razi S. Short Form-McGill Pain Questionnaire-2 (SF-MPQ-2): A Cross-Cultural Adaptation and Validation Study of the Persian Version in Patients with Knee Osteoarthritis. *Arch Bone Jt Surg*. 2015 Jan;3(1):45-50. Epub 2015 Jan 15. PMID: 25692169; PMCID: PMC4322125..
56. Fontana Carvalho AP, Dufresne SS, Rogerio de Oliveira M, Couto Furlanetto K, Dubois M, Dallaire M, Ngomo S, da Silva RA. Effects of lumbar stabilization and muscular stretching on pain, disabilities, postural control and muscle activation in pregnant woman with low back pain. *Eur J Phys Rehabil Med*. 2020 Jun;56(3):297-306. doi: 10.23736/S1973-9087.20.06086-4. Epub 2020 Feb 18. PMID: 32072792.
57. França FR, Burke TN, Hanada ES, Marques AP. Segmental stabilization and muscular strengthening in chronic low back pain: a comparative study. *Clinics (Sao Paulo)*. 2010;65(10):1013-7. doi: 10.1590/s1807-59322010001000015. PMID: 21120303; PMCID: PMC2972594.
58. Dworkin RH, Turk DC, Trudeau JJ, Benson C, Biondi DM, Katz NP, Kim M. Validation of the Short-form McGill Pain Questionnaire-2 (SF-MPQ-2) in acute low back pain. *J Pain*. 2015 Apr;16(4):357-66. doi: 10.1016/j.jpain.2015.01.012. Epub 2015 Jan 29. PMID: 25640290.
59. Erdogan O, Malek M, Janal MN, Gibbs JL. Sensory testing associates with pain quality descriptors during acute dental pain. *Eur J Pain*. 2019 Oct;23(9):1701-1711. doi: 10.1002/ejp.1447. Epub 2019 Jul 22. PMID: 31241807.
60. Lewandowski AS, Palermo TM, Kirchner HL, Drotar D. Comparing diary and retrospective reports of pain and activity restriction in children and adolescents with chronic pain conditions. *Clin J Pain*. 2009 May;25(4):299-306. doi: 10.1097/AJP.0b013e3181965578. PMID: 19590478; PMCID: PMC2709738.

61. Vertsberger D, Talmon A, Ziadni M, Kong JT, Darnall BD, Manber R, Mackey S, Gross JJ. Intensity of Chronic Low Back Pain and Activity Interference: A Daily Diary Study of the Moderating Role of Cognitive Pain Coping Strategies. *Pain Med.* 2023 Apr 3;24(4):442-450. doi: 10.1093/pm/pnac151. PMID: 36214626; PMCID: PMC10069845.
62. Karoly P, Okun MA, Enders C, Tennen H. Effects of pain intensity on goal schemas and goal pursuit: a daily diary study. *Health Psychol.* 2014 Sep;33(9):968-76. doi: 10.1037/hea0000093. PMID: 25180547; PMCID: PMC4155604.
63. Gruszka P, Stammen C, Bissantz N, Jensen MP. Pain vs. comfort diary: A fully remote app-based experiment. *Eur J Pain.* 2019 Oct;23(9):1674-1687. doi: 10.1002/ejp.1446. Epub 2019 Jun 24. PMID: 31233662.
64. Mitra S, Jain K, Singh J, Saxena P, Nyima T, Selvam SR, Walia MC. Clinical Utility of the Behavioral Pain Assessment Tool in Patients Admitted in the Intensive Care Unit. *Indian J Crit Care Med.* 2020 Aug;24(8):695-700. doi: 10.5005/jp-journals-10071-23521. PMID: 33024377; PMCID: PMC7519617.
65. Delgado A, Ok SM, Ho D, Lynd T, Cheon K. Evaluation of children's pain expression and behavior using audio visual distraction. *Clin Exp Dent Res.* 2021 Oct;7(5):795-802. doi: 10.1002/cre2.407. Epub 2021 Feb 23. PMID: 33622030; PMCID: PMC8543459.
66. Gomarverdi S, Sedighie L, Seifrabiei MA, Nikooseresht M. Comparison of Two Pain Scales: Behavioral Pain Scale and Critical-care Pain Observation Tool During Invasive and Noninvasive Procedures in Intensive Care Unit-admitted Patients. *Iran J Nurs Midwifery Res.* 2019 Mar-Apr;24(2):151-155. doi: 10.4103/ijnmr.IJNMR\_47\_18. PMID: 30820228; PMCID: PMC6390431.
67. Ruscheweyh R, Verneuer B, Dany K, Marziniak M, Wolowski A, Çolak-Ekici R, Schulte TL, Bullmann V, Grewe S, Gralow I, Evers S, Knecht S. Validation of the pain sensitivity questionnaire in chronic pain patients. *Pain.* 2012 Jun;153(6):1210-1218. doi: 10.1016/j.pain.2012.02.025. Epub 2012 Apr 25. PMID: 22541722.
68. Sellers AB, Ruscheweyh R, Kelley BJ, Ness TJ, Vetter TR. Validation of the English language pain sensitivity questionnaire. *Reg Anesth Pain Med.* 2013 Nov-Dec;38(6):508-14. doi: 10.1097/AAP.000000000000007. PMID: 24141873.
69. Bell BA, Ruscheweyh R, Kelley BJ, Ness TJ, Vetter TR, Sellers AB. Ethnic Differences Identified by Pain Sensitivity Questionnaire Correlate With Clinical Pain Responses. *Reg Anesth Pain Med.* 2018 Feb;43(2):200-204. doi: 10.1097/AAP.0000000000000689. PMID: 29278602.
70. Heary KO, Wong AWK, Lau SCL, Dengler J, Thompson MR, Crock LW, Novak CB, Philip BA, Mackinnon SE. Quality of Life and Psychosocial Factors as Predictors of Pain Relief Following Nerve Surgery. *Hand (N Y).* 2022 Mar;17(2):193-199. doi: 10.1177/1558944720911213. Epub 2020 Mar 19. PMID: 32188297; PMCID: PMC8984711.
71. Müller R, Landmann G, Béchir M, Hinrichs T, Arnet U, Jordan X, Brinkhof MWG. Chronic pain, depression and quality of life in individuals with spinal cord injury: Mediating role of participation. *J Rehabil Med.* 2017 Jun 28;49(6):489-496. doi: 10.2340/16501977-2241. PMID: 28597908.
72. Kwan YH, Fong WW, Lui NL, Yong ST, Cheung YB, Malhotra R, Østbye T, Thumboo J. Validity and reliability of the Short Form 36 Health Surveys (SF-36) among patients with spondyloarthritis in Singapore. *Rheumatol Int.* 2016 Dec;36(12):1759-1765. doi: 10.1007/s00296-016-3567-3. Epub 2016 Sep 23. PMID: 27664139.
73. Kishi M, Abe A, Yonemitsu M. Relationship between the SF-36 questionnaire and patient's satisfaction following halitosis therapy. *Oral Dis.* 2005;11 Suppl 1:89-91. doi: 10.1111/j.1601-0825.2005.01102.x. PMID: 15752110.
74. Campos LA, Peltomäki T, Marôco J, Campos JADB. Use of Oral Health Impact Profile-14 (OHIP-14) in Different Contexts. What Is Being Measured? *Int J Environ Res Public Health.* 2021 Dec 20;18(24):13412. doi: 10.3390/ijerph182413412. PMID: 34949018; PMCID: PMC8703465.



75. Omara M, Salzberger T, Boecker M, Bekes K, Steiner G, Nell-Duxneuner V, Ritschl V, Mosor E, Kloppenburg M, Sautner J, Steinecker-Frohnwieser B, Stamm T. Improving the measurement of oral health-related quality of life: Rasch model of the oral health impact profile-14. *J Dent*. 2021 Nov;114:103819. doi: 10.1016/j.jdent.2021.103819. Epub 2021 Sep 21. PMID: 34560224.
76. Musskopf ML, Milanese FC, Rocha JMD, Fiorini T, Moreira CHC, Susin C, Rösing CK, Weidlich P, Oppermann RV. Oral health related quality of life among pregnant women: a randomized controlled trial. *Braz Oral Res*. 2018;32:e002. doi: 10.1590/1807-3107bor-2018.vol32.0002. Epub 2018 Jan 22. PMID: 29364329.
77. Yule PL, Durham J, Playford H, Moufti MA, Steele J, Steen N, Wassell RW, Ohrbach R. OHIP-TMDs: a patient-reported outcome measure for temporomandibular disorders. *Community Dent Oral Epidemiol*. 2015 Oct;43(5):461-70. doi: 10.1111/cdoe.12171. Epub 2015 Jun 4. PMID: 26040190.
78. Serrano J, López-Pintor RM, Fernández-Castro M, Ramírez L, Sanz M, López J, Blázquez MÁ, González JJ, Hernández G; EPOX-SSp Group. Usefulness of implementing the OHIP-14 questionnaire to assess the impact of xerostomia and hyposalivation on quality of life in patients with primary Sjögren's syndrome. *J Oral Pathol Med*. 2022 Oct;51(9):810-817. doi: 10.1111/jop.13348. Epub 2022 Sep 30. PMID: 35998227; PMCID: PMC9828657.
79. Chana P, Smith JG, Karamat A, Simpson A, Renton T. Catastrophising, pain self-efficacy and acceptance in patients with Burning Mouth Syndrome. *J Oral Rehabil*. 2021 Apr;48(4):458-468. doi: 10.1111/joor.13136. Epub 2021 Jan 5. PMID: 33368621.
80. López-Jornet P, Camacho-Alonso F, Lucero-Berdugo M. Quality of life in patients with burning mouth syndrome. *J Oral Pathol Med*. 2008 Aug;37(7):389-94. doi: 10.1111/j.1600-0714.2008.00672.x. Epub 2008 Jul 9. PMID: 18665968.
81. Kyle PR, Lemming OM, Timmerby N, Søndergaard S, Andreasson K, Bech P. The Validity of the Different Versions of the Hamilton Depression Scale in Separating Remission Rates of Placebo and Antidepressants in Clinical Trials of Major Depression. *J Clin Psychopharmacol*. 2016 Oct;36(5):453-6. doi: 10.1097/JCP.0000000000000557. PMID: 27525966.
82. Carneiro AM, Fernandes F, Moreno RA. Hamilton depression rating scale and montgomery-asberg depression rating scale in depressed and bipolar I patients: psychometric properties in a Brazilian sample. *Health Qual Life Outcomes*. 2015 Apr 2;13:42. doi: 10.1186/s12955-015-0235-3. PMID: 25889742; PMCID: PMC4391145.
83. Meltzer-Brody SE, Zolnoun D, Steege JF, Rinaldi KL, Leserman J. Open-label trial of lamotrigine focusing on efficacy in vulvodynia. *J Reprod Med*. 2009 Mar;54(3):171-8. PMID: 19370903; PMCID: PMC4676413.
84. Donham GW, Ludenia K. Cross-validation of the State-Trait Anxiety Inventory with an alcoholic population. *J Clin Psychol*. 1984 Mar;40(2):629-31. doi: 10.1002/1097-4679(198403)40:2<629::aid-jclp2270400244>3.0.co;2-a. PMID: 6725591.
85. Canfora F, Calabria E, Pecoraro G, D Aniello L, Aria M, Marenzi G, Sammartino P, Mignogna MD, Adamo D. The use of self-report questionnaires in an analysis of the multidimensional aspects of pain and a correlation with the psychological profile and quality of life in patients with burning mouth syndrome: A case-control study. *J Oral Rehabil*. 2022 Sep;49(9):890-914. doi: 10.1111/joor.13343. Epub 2022 Jun 21. PMID: 35611463; PMCID: PMC9544557.
86. Zitser J, Allen IE, Falgàs N, Le MM, Neylan TC, Kramer JH, Walsh CM. Pittsburgh Sleep Quality Index (PSQI) responses are modulated by total sleep time and wake after sleep onset in healthy older adults. *PLoS One*. 2022 Jun 24;17(6):e0270095. doi: 10.1371/journal.pone.0270095. PMID: 35749529; PMCID: PMC9232154.
87. Freedland KE, Steinmeyer BC, Carney RM, Rubin EH, Rich MW. Use of the PROMIS® Depression scale and the Beck Depression Inventory in patients with heart failure. *Health Psychol*. 2019 May;38(5):369-375. doi: 10.1037/hea0000682. PMID: 31045419; PMCID: PMC6499487.

88. Choi Y, Mayer TG, Williams MJ, Gatchel RJ. What is the best screening test for depression in chronic spinal pain patients? *Spine J.* 2014 Jul 1;14(7):1175-82. doi: 10.1016/j.spinee.2013.10.037. Epub 2013 Nov 10. PMID: 24225008.
89. Chan CYY, Tsang HHL, Lau CS, Chung HY. Prevalence of depressive and anxiety disorders and validation of the Hospital Anxiety and Depression Scale as a screening tool in axial spondyloarthritis patients. *Int J Rheum Dis.* 2017 Mar;20(3):317-325. doi: 10.1111/1756-185X.12456. Epub 2014 Oct 7. PMID: 25293872.
90. Nipp RD, Fuchs G, El-Jawahri A, Mario J, Troschel FM, Greer JA, Gallagher ER, Jackson VA, Kambadakone A, Hong TS, Temel JS, Fintelman FJ. Sarcopenia Is Associated with Quality of Life and Depression in Patients with Advanced Cancer. *Oncologist.* 2018 Jan;23(1):97-104. doi: 10.1634/theoncologist.2017-0255. Epub 2017 Sep 21. PMID: 28935775; PMCID: PMC5759817.
91. Mitchell AJ, Meader N, Symonds P. Diagnostic validity of the Hospital Anxiety and Depression Scale (HADS) in cancer and palliative settings: a meta-analysis. *J Affect Disord.* 2010 Nov;126(3):335-48. doi: 10.1016/j.jad.2010.01.067. Epub 2010 Mar 5. PMID: 20207007.
92. Sikora M, Verzak Ž, Matijević M, Včev A, Siber S, Musić L, Carek A. Anxiety and Depression Scores in Patients with Burning Mouth Syndrome. *Psychiatr Danub.* 2018 Dec;30(4):466-470. doi: 10.24869/psyd.2018.466. PMID: 30439807.
93. Malik R, Goel S, Misra D, Panjwani S, Misra A. Assessment of anxiety and depression in patients with burning mouth syndrome: A clinical trial. *J Midlife Health.* 2012 Jan;3(1):36-9. doi: 10.4103/0976-7800.98816. PMID: 22923978; PMCID: PMC3425147.
94. Burns JW, Day MA, Thorn BE. Is reduction in pain catastrophizing a therapeutic mechanism specific to cognitive-behavioral therapy for chronic pain? *Transl Behav Med.* 2012 Mar;2(1):22-9. doi: 10.1007/s13142-011-0086-3. PMID: 24073095; PMCID: PMC3717814.
95. Shi Z, Li S, Chen G. Assessing the Psychometric Properties of the Chinese Version of Ten-Item Personality Inventory (TIPI) Among Medical College Students. *Psychol Res Behav Manag.* 2022 May 16;15:1247-1258. doi: 10.2147/PRBM.S357913. PMID: 35603350; PMCID: PMC9121988.
96. Nunes A, Limpo T, Lima CF, Castro SL. Short Scales for the Assessment of Personality Traits: Development and Validation of the Portuguese Ten-Item Personality Inventory (TIPI). *Front Psychol.* 2018 Apr 5;9:461. doi: 10.3389/fpsyg.2018.00461. PMID: 29674989; PMCID: PMC5895732.
97. Thørrisen MM, Sadeghi T, Wiers-Jenssen J. Internal Consistency and Structural Validity of the Norwegian Translation of the Ten-Item Personality Inventory. *Front Psychol.* 2021 Aug 11;12:723852. doi: 10.3389/fpsyg.2021.723852. PMID: 34456829; PMCID: PMC8385139.
98. Tu TTH, Watanabe M, Suga T, Hong C, Takao C, Takenoshita M, Motomura H, Toyofuku A. Personality Traits in Burning Mouth Syndrome Patients With and Without a History of Depression. *Front Psychiatry.* 2021 Jul 29;12:659245. doi: 10.3389/fpsyg.2021.659245. PMID: 34393842; PMCID: PMC8358652.
99. Darnall BD, Sturgeon JA, Cook KF, Taub CJ, Roy A, Burns JW, Sullivan M, Mackey SC. Development and Validation of a Daily Pain Catastrophizing Scale. *J Pain.* 2017 Sep;18(9):1139-1149. doi: 10.1016/j.jpain.2017.05.003. Epub 2017 May 19. PMID: 28528981; PMCID: PMC5581222.
100. Cano A, Leonard MT, Franz A. The significant other version of the Pain Catastrophizing Scale (PCS-S): preliminary validation. *Pain.* 2005 Dec 15;119(1-3):26-37. doi: 10.1016/j.pain.2005.09.009. Epub 2005 Nov 17. PMID: 16298062; PMCID: PMC2679670.
101. Rogulj AA, Richter I, Brailo V, Krstevski I, Boras VV. CATASTROPHIZING IN PATIENTS WITH BURNING MOUTH SYNDROME. *Acta Stomatol Croat.* 2014 Jun;48(2):109-15. PMID: 27688354; PMCID: PMC4872800.
102. Walker NA, Sunderram J, Zhang P, Lu SE, Scharf MT. Clinical utility of the Epworth sleepiness scale. *Sleep Breath.* 2020 Dec;24(4):1759-1765. doi: 10.1007/s11325-020-02015-2. Epub 2020 Jan 14. PMID: 31938991.

103. Sap-Anan N, Pascoe M, Wang L, Grigg-Damberger MM, Andrews ND, Foldvary-Schaefer N. The Epworth Sleepiness Scale in epilepsy: Internal consistency and disease-related associations. *Epilepsy Behav.* 2021 Aug;121(Pt A):108099. doi: 10.1016/j.yebeh.2021.108099. Epub 2021 Jun 5. PMID: 34102473.
104. Frohnhofen H, Popp R, Willmann V, Heuer HC, Firat A. Feasibility of the Epworth Sleepiness Scale in a sample of geriatric in-hospital patients. *J Physiol Pharmacol.* 2009 Nov;60 Suppl 5:45-9. PMID: 20134038.
105. Damiani MF, Quaranta VN, Falcone VA, Gadaleta F, Maiellari M, Ranieri T, Fanfulla F, Carratù P, Resta O. The Epworth Sleepiness Scale: conventional self vs physician administration. *Chest.* 2013 Jun;143(6):1569-1575. doi: 10.1378/chest.12-2174. PMID: 23450315.
106. Adamo D, Sardella A, Varoni E, Lajolo C, Biasotto M, Ottaviani G, Vescovi P, Simonazzi T, Pentenero M, Ardore M, Spadari F, Bombeccari G, Montebugnoli L, Gissi DB, Campisi G, Panzarella V, Carbone M, Valpreda L, Giuliani M, Aria M, Lo Muzio L, Mignogna MD. The association between burning mouth syndrome and sleep disturbance: A case-control multicentre study. *Oral Dis.* 2018 May;24(4):638-649. doi: 10.1111/odi.12807. Epub 2018 Mar 13. PMID: 29156085.
107. Kirmizigil B, Demiralp C. Effectiveness of functional exercises on pain and sleep quality in patients with primary dysmenorrhea: a randomized clinical trial. *Arch Gynecol Obstet.* 2020 Jul;302(1):153-163. doi: 10.1007/s00404-020-05579-2. Epub 2020 May 15. PMID: 32415471.
108. Lee YH DDS, PhD, Chon S MD, PhD. Burning mouth syndrome in postmenopausal women with self-reported sleep problems. *Cranio.* 2020 Jul;38(4):221-232. doi: 10.1080/08869634.2018.1512549. Epub 2018 Aug 31. PMID: 30165803.
109. Lee GS, Kim HK, Kim ME. Relevance of sleep, pain cognition, and psychological distress with regard to pain in patients with burning mouth syndrome. *Cranio.* 2022 Jan;40(1):79-87. doi: 10.1080/08869634.2019.1681621. Epub 2019 Oct 24. PMID: 31648618.
110. Lopez-Jornet P, Lucero-Berdugo M, Castillo-Felipe C, Zamora Lavella C, Ferrandez-Pujante A, Pons-Fuster A. Assessment of self-reported sleep disturbance and psychological status in patients with burning mouth syndrome. *J Eur Acad Dermatol Venereol.* 2015 Jul;29(7):1285-90. doi: 10.1111/jdv.12795. Epub 2014 Oct 28. PMID: 25351854.
